# *Fine-scale fronts as hotspots of fish aggregation in the open ocean*

Alberto Baudena<sup>1,2</sup>, Enrico Ser-Giacomi<sup>1</sup>, Donatella d'Onofrio<sup>3,4</sup>, Xavier Capet<sup>1</sup>, Cedric Cotté<sup>1</sup>, Yves Cherel<sup>5</sup>, and Francesco d'Ovidio<sup>1</sup>

<sup>1</sup> Sorbonne Université, CNRS, IRD, MNHN, Laboratoire d'Océanographie et du Climat: Expérimentations et Approches Numériques (LOCEAN-IPSL), Paris, France

<sup>2</sup> Sorbonne Université, Institut de la Mer de Villefranche sur mer, Laboratoire d'Océanographie de Villefranche, F-06230 Villefranche-sur-Mer, France

<sup>3</sup> Institute of Atmospheric Sciences and Climate, National Research Council (CNR-ISAC), Torino, Italy

<sup>4</sup> Copernicus Institute of Sustainable Development, Environmental Science Group, Utrecht University, The Netherlands

<sup>5</sup> Centre d'Etudes Biologiques de Chizé (CEBC), UMR 7372 du CNRS-La Rochelle Université, 79360 Villiers-en-Bois, France

**Abstract.** Oceanic Lagrangian Coherent Structures have been shown to deeply influence the distribution of primary producers and, at the other extreme of the trophic chain, top predators. However, the relationship between these structures and intermediate trophic levels is much more obscure. In this paper we address this knowledge gap by comparing acoustic measurements of mesopelagic fish concentrations to satellite-derived fine-scale Lagrangian Coherent Structures in the open ocean. The results demonstrate unambiguously that higher fish concentrations are significantly associated with stronger Lagrangian Coherent Structures, and we observe that these features represent a limiting condition for high fish concentrations. A model, specifically built for mid trophic levels with realistic parameters, provides a possible mechanism of fish aggregation, and is coherent with the observations. These results may help to integrate intermediate trophic levels in trophic models, which can ultimately support management and conservation policies.

## Introduction

Marine biomass distribution is highly patchy and variable in time across the entire trophic web Bertrand et al. (2014); McManus and Woodson (2012). Discerning the factors underpinning ocean patchiness is fundamental to understand how they influence biogeochemical reactions and ecosystem stability Martin (2003); Lévy and Martin (2013). These issues are pivotal for conservation purposes Gaines et al. (2010) and for assessing the impact of climate change on the marine environment Hoegh-Guldberg and Bruno (2010).

One of the origins of the heterogeneity of the biotic fields is the dynamic nature of the ocean environments, which transforms the water masses on a large range

of temporal scales, including those of ecological relevance. In this regard, a special role is fulfilled by the mesoscale and submesoscale McGillicuddy (2016), now commonly referred to together as “fine-scales”, which span a spatial range from a few to hundreds of kilometers.

One fruitful approach for capturing the structuring effect of fine-scale dynamics is the extraction of so-called Lagrangian Coherent Structures, and in particular Lagrangian fronts Haller (2015); Lehahn et al. (2018). Lagrangian Coherent Structures (LCSs) provide several types of information regarding flow properties, such as the location of fronts, barriers to transport Boffetta et al. (2001), or retentive and coherent regions d’Ovidio et al. (2013). One of the most common Lagrangian diagnostics used to determine LCSs is the Finite-size Lyapunov Exponent (FSLE, d’Ovidio et al., 2004). This measures the exponential rate of water parcel deformation and has maximal values over frontal regions.

By shaping and elongating water patches, Lagrangian Coherent Structures have been demonstrated to set the frontiers of phytoplanktonic patches in terms of chlorophyll concentration Lehahn et al. (2018), and even functional type d’Ovidio et al. (2010). This in turn enhances contacts between different communities, regulating plankton diversity De Monte et al. (2013).

More recently, advances in biologging programs provided evidence on the impact of fine-scale structures on top predators behavior. The concentration of predators foraging efforts has been observed in the neighbourhoods of Lagrangian fronts Kai et al. (2009); Scales et al. (2018). Furthermore, fronts detected by Lagrangian Coherent Structures (which in the following we will call Lagrangian fronts) have been observed to influence predators movements Della Penna et al. (2015). This could enhance energy transfer and gain Abrahms et al. (2018).

However, while the influence of Lagrangian fronts has been observed on both extremes of the trophic chain, much less is known about mid-trophic levels. Prants et al. (see in particular Prants et al., 2014) demonstrated a correlation between Pacific saury catches and Lyapunov exponents, and Watson et al. (2018) found that several fishery vessels track LCSs when targeting fishery spots. However, these results leave some concerns about possible biases because commercial fisheries provides only punctual observations, and because they are even known to use satellite images. Therefore, fishing vessels may target intentionally frontal systems. Unbiased fish measurements have been instead recently used by Sato et al. (2018) to analyse the relationship between a frontal system and acoustic measurements in a coastal upwelling system. This allowed the authors to highlight the different role played by in-shore and off-shore waters. In terms of the mechanisms which can explain how fine-scale structures influence mid-trophic biomass distribution, even less is known. Classical explanations are based primarily on bottom-up mechanisms along fronts with intense upwelling Yoder et al. (1994); Woodson and Litvin (2015). However, these hypothesis do not take into account the necessity of a maturation time, which in the case of fish is consistently longer than both the growth response of lower trophic levels and the lifetime of the front. Neither the fish behavior is considered, despite the fact that fish possess efficient sensorial and swimming capacities along the horizontal

(Kasumyan (2004) and Supporting Information SI.2).

The objective of the present study is to analyze the relationship between fine-scale structures in the open ocean and mid-trophic organisms with unbiased, direct observations of fish concentrations, and to propose a mechanism by which fine-scales organize mid-trophic biomass.

This study was conducted in the subantarctic area of the southern Indian ocean. The functioning of this region is mainly regulated by the Kerguelen plateau, a major topographic barrier for the Antarctic Circumpolar Current (ACC). The plateau enriches in iron, a limiting nutrient, the high-nutrients-low-chlorophyll waters advected by the ACC. Depending on seasonal light conditions and stratification of the water column, this provokes a large annual phytoplanktonic bloom, which supports a rich trophic chain. This is one of the reasons for which the Kerguelen archipelago and its surrounding waters are part of one of the ten largest marine protected areas in the world (<http://www.mpatlas.org/>).

In this region, the myctophids, also known as lantern fish, are one of the most abundant groups of mesopelagic fish. They are also present in other oceans worldwide and are thought to constitute one of the largest portions of world fish biomass Irigoien et al. (2014). They also represent important prey items for numerous predators Cherel et al. (2010). Myctophids are reported to play a central role in the carbon export to deep sea depths, and are suspected to affect the climate Kwon et al. (2009). Constituting a potentially massive harvestable resource, they are threatened to be exploited in the near future St. John et al. (2016). A better understanding of the mechanisms regulating their biomass is thus urgently needed.

In this paper, we relate acoustic measurements of fish concentrations and satellite derived diagnostics. These diagnostics allow us to identify the intensity of several fine scale fronts. The aim is to explore the degree to which fish distribution is shaped by these fine-scale features, and in particular Lagrangian fronts. Our results indicate that stronger Lagrangian fronts aggregate larger quantities of fish, although not all these structures are aggregation sites. We then propose a simple aggregating mechanism specifically designed for fish, based on a cue pursuing dynamic along the horizontal dimension. Myctophids are supposed to be able to orientate and to actively swim to search for food (hypothesis discussed in SI.2). They follow a gradient of a passive tracer, which is considered a proxy for heterogeneously-distributed zooplankton. All the parameters values of this model are set using observational data (SI.5) and none of them has been optimized nor fitted. The predictions of such model are consistent with the observed concentrations. In addition, the model provides also theoretical estimations of the dominant spatio-temporal scales of aggregation.

#### 4 Fine-scale fronts as hotspots of fish aggregation in the open ocean.

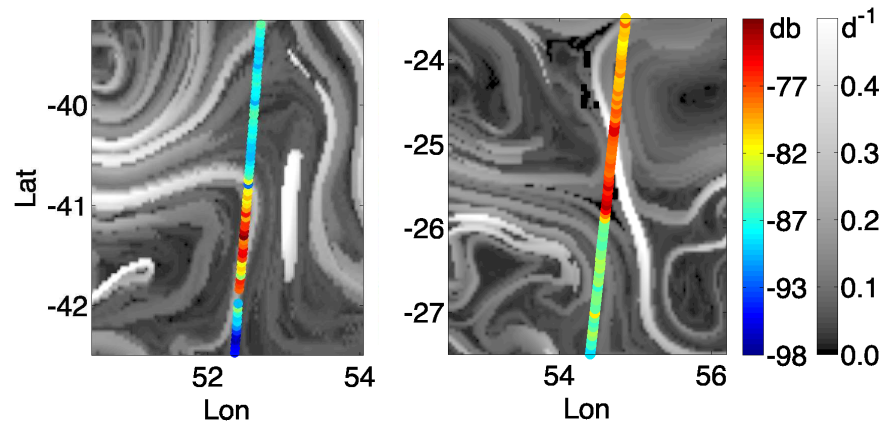

Fig. 1: Illustrative examples of two transects of the boat trajectory. The color of each dot is proportional to the Acoustic Fish Concentration (in decibels, right colorbar for scale). The transects are superimposed on a simultaneous field of Finite-size Lyapunov Exponents. These identify fine-scale frontal structures. They are computed with altimetry derived velocities ( $\text{days}^{-1}$ , left colorbar for the scale). Left panel: August, 29th, 2014. Right panel: August, 31st, 2013.

## Results

### Relationships between acoustic fish concentration and satellite-derived diagnostics

We used ship acoustic measurements acquired along 6 transects of 2860 linear kilometers. For each point of the boat trajectory, we computed a value of Acoustic Fish Concentration (AFC). This is representative of the fish concentration in the water column. Alongside this, we calculate two satellite derived diagnostics: the Finite-size Lyapunov Exponent (FSLE) and the Sea Surface Temperature (SST) gradient. These two metrics are typically associated with front intensity (see Materials and Methods for further details). Other diagnostics are reported in SI.1. In-situ temperature measurement were available only on a part of the transects, and were therefore not considered in the analysis.

Fig. 1 depicts two illustrative examples of the boat trajectory on August 29<sup>th</sup>, 2014 and August 31<sup>st</sup>, 2013 respectively. They are superposed on a field of Finite-size Lyapunov exponents. The latter are associated with frontal features. Each dot of the boat trajectory is colored proportionally to the AFC in that point. On both the panels, AFC values indicate a qualitative agreement with the FSLE, increasing in correspondence of the frontal features identified by high values of the Lyapunov exponents.

Fig. 2 depicts the scatter plots of the AFC against the two diagnostics, with both the axes in logarithmic scale. To determine whether the AFC values present significant differences in proximity of fine-scale features, a bootstrap analysis was conducted. Details of the methodology are provided in Materials and Methods

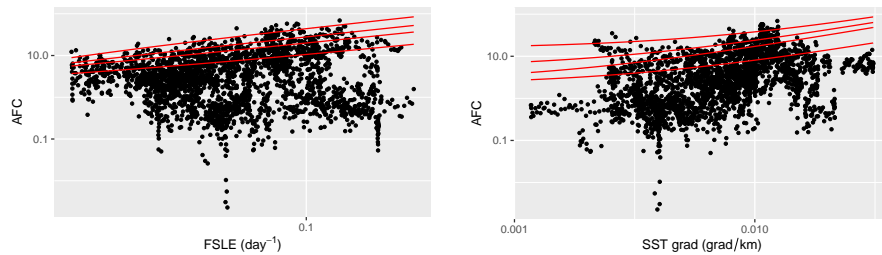

134

135 Fig. 2: Scatter plot of AFC against FSLE (left panel) and SST gradient (right panel).  
 136 The lines, from the bottom to the top, indicate the linear quantile regressions at 75th,  
 137 90th, 95th and 99th percentiles. The analysis is used to investigate the relationship  
 138 between the front intensity and just the higher values of fish concentration. Both axes  
 139 are in logarithmic scale (values equal to zero are therefore not depicted). Values of the  
 140 quantile regression coefficients are reported in Table S.1.

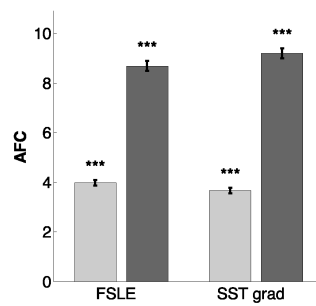

142

143 Fig. 3: Bootstrap method results. Left columns refer to FSLE analysis, right columns  
 144 to SST gradient. Light gray columns represent the mean AFC under the respective  
 145 threshold, and the dark gray columns represent the mean AFC over the threshold.  
 146 Error bars indicate the standard deviation, while black stars indicate the significance  
 148 of the bootstrap test.

169 section. The results are reported in Fig. 3. Significantly higher AFC values are  
 170 detected over the thresholds ( $p$ -value  $< 0.001$ ) for both FSLE and SST gradient.

171 Finally, linear quantile regression method was employed Koenker (2005). This  
 172 analysis was used to investigate the relationship between the higher values of  
 173 AFC and the front intensity. Results of the regression are displayed in Fig. 2 as  
 174 red lines. All the quantile slopes are statistically different from zero. This sug-  
 175 gests the presence of a positive relationship between the higher values of AFC  
 176 and FSLE and SST gradient (Table S.1).

## 177 A fine-scale mechanism of fish aggregation

178 Why do fish aggregate along frontal features? We addressed this question by  
 179 proposing a simple mathematical model. The model assumes a gradient climb-

ing capacity, which is one of the most widespread movement mechanisms used in other biological contexts (e.g., chemotaxis, Adler (1975)). This gradient climbing capacity is specifically tuned for mid-trophic organisms and myctophids and is based on a cue pursuing dynamic. Fish try to climb a gradient of tracer. We considered this tracer a proxy of zooplankton concentration, prey of several fish species, and in particular of myctophids Pakhomov et al. (1996). At the scales considered in this study (10s of kilometers) zooplankton swimming capacities are restricted to the vertical axis Genin et al. (2005). They can thus be considered, along the horizontal axis, passive tracers. Along this dimension, zooplankton aggregation and growth is usually driven by a relatively fast response to nutrients presence, of the order of days to weeks Vidal (1980). In particular, this is valid also for zooplankton species present in our study region Alonzo et al. (2003); Labat et al. (2005). Conversely, fish have growth rates consistently slower: in particular, pelagic fishes and myctophids are considered as “slow-growing fish”, with lifetimes spanning few years Greely et al. (1999). Therefore, their aggregation can not be explained by the same dynamics affecting the zooplankton. Alongside this, fish have extremely developed sensorial capacities and, differently from zooplankton, they can actively swim, with both capacities involved in many functional activities, including feeding Kasumyan (2004). These arguments support our approach of modelling zooplankton as a passive tracer and fish as active swimmers (we invite the reader to refer to SI.2 for further details). To include ocean patchiness, we perturbed the ability of the fish to properly identify the spots of zooplankton with a noise term. However, we assumed that fish are able to orientate without problems over a given threshold of the zooplankton gradient. This threshold was estimated from the zooplankton concentrations (SI.5). Making these assumptions, the average velocity of a group of fish  $U_F(x)$  can be found applying simple algebra to a standard gradient climbing model (see Materials and Methods, subsection “Gradient climbing model”):

$$U_F(x) = V \frac{\frac{\partial T}{\partial x}}{\frac{\partial T}{\partial x} MAX} \left( 2 - \frac{\left| \frac{\partial T}{\partial x} \right|}{\frac{\partial T}{\partial x} MAX} \right) \quad (1)$$

in which  $T$  is the zooplankton concentration,  $\frac{\partial T}{\partial x} MAX$  is the threshold of the zooplankton gradient, and  $V$  is the cruising speed of the myctophids. Similarly, the evolution of the fish concentration over time can be easily obtained from the one-dimensional continuity equation, by imposing the conservation of fish total biomass, and by using Expr. 4 (see Materials and Methods for further details). The tracer shape used describes a sigmoid function, which models a generic local gradient in the zooplankton concentration. At the limits of the plateau, the tracer decreases along a distance of  $\sim 5$  km, a typical fine-scale range. Four different snapshots (at 0, 6 hours, 1 day and 4 days) of the fish modelled concentration are illustrated in Fig. 4. Intuitively, having chosen a gradient-climbing behavior, one can expect that fish concentration will evolve quickly in the regions in which the tracer gradient is larger. Indeed, after only 6 hours,

two peaks of doubled concentration are present in correspondence with the margins of the tracer plateau. In the following days, the two peaks decreased their growth rate, while the concentration between them increases until they merged together. The fish concentration is thus homogeneous over the plateau, presenting values between 2.5 and 3.5 times higher than the initial concentration. In case of a larger plateau (Fig. 5), the model predicts a similar behavior, but the merging between the peaks occurs over longer timescales. In that case, the peaks reach their maximum value after the first day, with the creation of two regions of increased concentration at the margins of the plateau. Changing the type of fish behavior leads to similar results (see SI.3). We note that this mechanism does not explicitly take into account fronts. However, in the oceanic environment, frontal regions represent areas of convergence of water masses with different properties. This is why regions of strong gradients are often associated to frontal features Yoder et al. (1994). However, at the same time during which this mechanism occurs, the tracer can evolve. As a sensitivity test, we numerically analyzed a scenario in which the tracer, subjected to a typical frontal dynamics, is stretched in a filament and eroded by diffusion (SI.4). Using realistic bio-physical parameters representative of the study area, we found that these tracer dynamics do not compromise the aggregation mechanism presented above, but may even facilitate the aggregation of fish along frontal zones. Indeed, the model developed predicts several quantitative information, such as an estimate of the fish aggregation over time. The latter highlighted a final concentration, on average, an order of magnitude stronger than the initial one. In addition, it was possible to obtain the “school life time”. This quantity indicates the amount of time during which a group of fish is able to follow a patch of interest before it vanishes due to the frontal

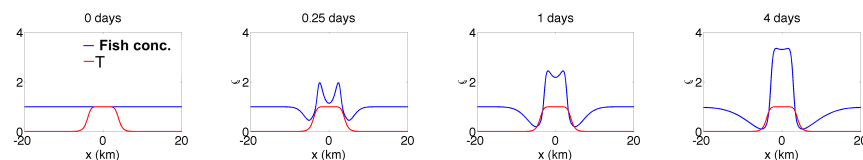

Fig. 4: Time evolution of the fish concentration (blue line, adimensional) according to the continuity equation. The tracer (red line, adimensional) describes a plateau of 8 km in width. At its limits, its values range from 1 to 0 in about 5 km. Each panel represents a different snapshot at 0, 6 hours, 1 day, and 4 days.

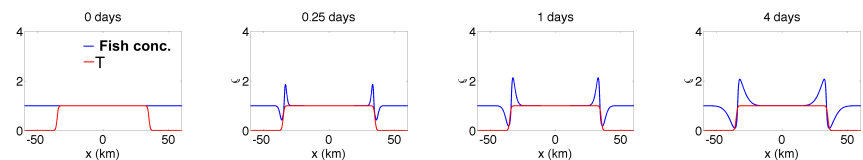

Fig. 5: Time evolution of the fish concentration as reported in Fig. 4. This time, the plateau width has been set to 70 km.



dynamics. The school life times we obtained ranged between 7 to 25 days, with an average value of around 2 weeks. Remarkably, this amount of time matches with that of fine-scale processes.

## Discussion

In the oceans, patchiness characterizes biomass distribution, which regulates ecosystem stability and biogeochemical processes Bertrand et al. (2014); Martin (2003); Lévy and Martin (2013). In the open ocean, biomass distribution is largely driven by processes at the fine-scale (between 1 and hundreds of kilometers or a few days to several weeks, such as lateral advection and horizontal stirring Martin (2003); Lévy et al. (2018).

One approach to studying the structuring processing occurring at this scale is provided by Lagrangian methods. In the past, Lagrangian tools like the computation of Lagrangian Coherent Structures have revealed the structuring role of fine-scale dynamics on primary levels of the trophic chain (see a review in Lehahn et al. (2018)). On the other hand, they have highlighted their influence on apex predators behaviors as well Kai et al. (2009); Scales et al. (2018).

However, less information is available on intermediate trophic levels. In the present study (i) we correlate the intensity of acoustic fish concentrations and fine-scale fronts, and (ii) we propose a mechanism of fish aggregation along fronts. We analyze the Kerguelen region in the Southern Ocean, one of the ten largest protected areas in the world, and an oasis for several threatened species (IUCN, <https://www.iucn.org/>). The reference fish of this study are the myctophids, which are highly diffused in that region and one of the most abundant group of mesopelagic fish in the world Irigoien et al. (2014).

Our results reveal a significant difference in fish concentration between frontal and non-frontal features. These are difficult to explain with traditional mechanisms usually prescribed to lower trophic levels, such as rapid growth associated to a presence of nutrient, because fish have slower growth rates. Therefore, starting from a homogeneous fish distribution and applying simple ecological rules, we propose a gradient-climbing model specifically calibrated for the study of mid-trophic organisms. Once parameterized with values typical for the study region, the model demonstrates a quick response to gradient structures. Two peaks of doubled concentration appear after just 6 hours, and then merge after 4 days. Fish thus tend to be homogeneously distributed over the entire patch of interest. This is in coherence with on-going studies on myctophids' response to food concentration. These presuppose that myctophids have a Holling type III functional response, in that they ingest always the same quantity of food over a certain prey density (A. Hulley, personal communication).

Tracer patchiness is known to be associated with frontal features Yoder et al. (1994); Lehahn et al. (2018). However, patchiness evolves, and under the double effect of stretching and diffusion, local gradients can be eroded. Thus, we tested the robustness of our model to this feature in SI.4. As in the former case, none of the parameters employed has been optimized nor fitted, but they all represent



rigorous estimations of Southern Ocean physical and biological conditions, such as stretching and mixing rates or fish cruising speed. Results allowed us to estimate a typical lifetime for a fine-scale patch of around two weeks, much longer than the peak doubling time ( $\sim 6$  hours). This robustness analysis is consistent with the hypothesis of a fixed tracer assumed in the gradient climbing scenario. Furthermore, we demonstrated that the stretching and diffusion dynamics can potentially enhance fish aggregations.

The patch of interest is considered as a proxy of zooplankton concentration. However, being parameterized as a passive tracer, it can be considered, more simply, as a physical water property. Indeed, physical characteristics, such as temperature, have been proven to be used by predators to find favorable conditions where concentrated food occurs Snyder et al. (2017).

The proposed mechanism of aggregation needs two obvious initial conditions: the presence of fish, and the presence of a zooplankton patch. It is presumable that fine-scale fronts, lacking one or both these conditions, cannot act as aggregating spots. Furthermore, while we assumed that the aggregation occurs after a certain amount of time, the environment studied is dynamic. Thus, it is likely that the aggregation mechanism was observed during different stages. The statistically significant positive relationships between the high values of acoustic fish concentration with the front intensity diagnostics confirms the previous considerations. Not all of the strong fronts detected indicate high acoustic fish concentrations. On the contrary, strong fish aggregation is preconditioned by the intensity of a frontal feature. Our results suggest that fronts represent in this regard a limiting condition for high fish concentrations. Model predictions are in accordance with the observations. Furthermore, the model provided estimations of other aggregation dynamics, such as the dimensions of the aggregation patterns or its intensity, with timescales comparable with those of fine scale processes. Specific experiments are necessary to validate these outputs, which however look promising.

Within the ACC, little information available on mid-trophic levels reported that the large circumpolar fronts are known to host (i) large densities of zooplankton and myctophids and (ii) that these organisms are patchily distributed Pakhomov and Froneman (2000). We identified in this study, at least partly, the potential mechanisms driving the patchiness observed at fine-scale. Assessing the preconditions and the other dynamics necessary for front aggregation is a new, open challenge emerging from the present work.

Note that in our work we focus only on open ocean Lagrangian fronts, that is, fine-scale frontal features induced by the mesoscale open ocean activity. In particular, we intentionally exclude coastal fronts as well as large scale fronts, whose dynamics and ecological role may be different (e.g., Lara-Lopez et al. (2012); Netburn and Koslow (2018); Sato et al. (2018)). Finally, the limitations of our analysis must be discussed. No vertical dynamics has been included in the model presented. However, these play an important role in the organization of marine biota Lévy et al. (2018), and, typically, stronger gradients are present along the vertical Ohman (1988). This assumption is due to the fact that, while

knowledge on horizontal dynamics is more advanced, 3D Lagrangian analyses, while appealing Sulman et al. (2013), are not currently possible, due to a lack of quantitative information on the vertical velocities of the ocean. Future satellite missions (such as SWOT: <https://swot.cnes.fr>) will possibly help to mitigate this problem, by helping the assimilation scheme to better reconstruct the three dimensional dynamics Morrow et al. (2019). At the same time, they will also improve satellite resolution, providing a more precise location of fine-scale fronts. The model studied does not consider the diel vertical migration of myctophids either. This choice is driven by the difficulty in parameterizing such a non linear behavior and in assimilating different migratory diel patterns. However, we note that many zooplankton species exhibit a diel cycle as well. Finally, zooplankton consumption due to fish foraging is considered to be negligible, or compensated by source terms (like blooms). The limitations presented can open the way for future investigations. Thus, the present study sheds some light on a largely unexplored topic.

The results presented here may be useful for improving the representation of intermediate trophic levels to coupled ecological and physical models Robinson et al. (2011), habitat models PC et al. (2018), targeting the mesopelagic compartment in particular. At the same time, the possibility of using Lagrangian Coherent Structures as a proxy of higher fish concentrations may further improve the integration of satellite-derived Lagrangian tools in conservation planning Penna et al. (2017).

## Materials and Methods

### Acoustic measurements

Two subsets of data were used for the analysis. Both of them were collected within the Mycto-3D-MAP program. The first subset (named MYCTO) was collected during 6 campaigns in 2013 and 2014, both in summer and in winter (see Tab. 1 for more details), using split-beam echo sounders at 38 and 120kHz. The data were then treated with a bi-frequency algorithm, applied to the 38 and 120 kHz frequencies (details of data collection and processing are provided in Béhagle et al. (2017)). This provides a quantitative estimation of the concentration of gas-bearing organisms, mostly attributed to fish containing a gas-filled swimbladder in the water column Kloser et al. (2009). Most mesopelagic fish present swimbladders and several works pointed out that myctophids are the dominant mesopelagic fish in the region Duhamel et al. (2014). Therefore, we considered the acoustic signal as mainly representative of myctophids concentration. Data were organized in acoustic units, averaging acoustic data over 1.1 km along the boat trajectory on average. Myctophid school length is in the order of tens of meters Saunders et al. (2013). For this reason, acoustic units were considered as not autocorrelated. Every acoustic unit is composed of 30 layers, ranging from 10 to 300 meters (30 layers in total).

The second subset of data (named ZOO) was collected between January the 22<sup>nd</sup> and February the 5<sup>th</sup>, 2014. It was processed in the same manner as the

other dataset, but this time the bifrequency algorithm was used to infer the zooplankton biomass. This second subset possesses a higher resolution with an acoustic unit every 206 m of the boat trajectory on average. The two datasets were used to infer the Acoustic Fish Concentration (AFC) and the Acoustic Zooplankton Concentration (AZC) in the water column, respectively. We considered as AFC (or AZC) of the point  $(x_i, y_i)$  the average of the bifrequency acoustic backscattering on the whole column, with the exclusion of the first layer. The latter was not considered due to surface noise. The AZC was used to compute the zooplankton gradient. The zooplankton gradient of a point  $i$  of the boat transect is computed as:

$$\frac{\partial Z}{\partial x}(i) = \frac{1}{2} \left( \frac{Z_i - Z_{i-1}}{d_{i-1}} + \frac{Z_{i+1} - Z_i}{d_i} \right)$$

in which  $d_i$  indicates the kilometric distance between the point  $i + 1$  and  $i$ , and  $Z_i$  is the cubic spline interpolation (to smooth the noise effects), in an around of 2 km, of the zooplankton concentrations. This type of interpolation, in contrast with the moving average, preserves the trend of the data, and thus a possible front.

#### Acoustic campaigns details

| Cruise            | Season | St. Date   | End Date   | Distance (km) |
|-------------------|--------|------------|------------|---------------|
| LOGIPEV193.RUNKER | Summer | 09/02/2013 | 17/02/2013 | 2752          |
| LOGIPEV193.KERMAU | Summer | 04/03/2013 | 10/03/2013 | 3781          |
| OP2013-2.RUNKER   | Winter | 30/08/2013 | 10/09/2013 | 3310          |
| LOGIPEV197.RUNKER | Summer | 06/01/2014 | 13/01/2014 | 2800          |
| LOGIPEV197.KERMAU | Summer | 06/02/2014 | 18/02/2014 | 2045          |
| OP2014-2.RUNKER   | Winter | 24/08/2014 | 04/09/2014 | 3677          |

Table 1: Details of the acoustic transects analyzed.

#### Regional data selection

The geographic area of interest of the present study is the Southern Ocean. To select the boat trajectory points belonging to this region, we used the ecopartition of Sutton et al. (2017). Only points falling in the *Antarctic Southern Ocean* region were considered. We highlight that this choice is consistent with the ecopartition of Koubbi et al. (2011) (group 5), which is specifically designed for the myctophids, the reference fish of this study. Furthermore, this choice allowed us to exclude major fronts which have been the subject of different research works Lara-Lopez et al. (2012); Netburn and Koslow (2018). In this way our analysis is focused specifically on fine scale fronts.

## 417 Day-night data separation

418 Several species of myctophids present a diel vertical migration. They live at great  
419 depths during the day (between 500 and 1000 m), ascending at dawn in the upper  
420 euphotic layer, where they spend the night. Since the maximal depth reached  
421 by our equipment is 300 m, in the analysis reported in Fig. 2 and 3 we excluded  
422 data collected during the day. However, their analysis is reported in SI.1. This is  
423 also consistent with the use of the Lagrangian and Eulerian diagnostics. These  
424 quantities, obtained from geostrophic velocity fields, are representative of the  
425 first part of the water column ( $\sim 50$  m).

## 426 Satellite data

427 *Velocity current data and processing.* Velocity currents are obtained from the Sea  
428 Surface Height (SSH), which is measured by satellite, through the geostrophic  
429 approximation. Data, which were downloaded from E.U. Copernicus Marine En-  
430 vironment Monitoring Service (CMEMS, <http://marine.copernicus.eu/>), were  
431 obtained from DUACS (Data Unification and Altimeter Combination System)  
432 delayed-time multi-mission altimeter, and displaced over a regular grid with spa-  
433 tial resolution of  $\frac{1}{4} \times \frac{1}{4}^\circ$  and a temporal resolution of 1 day.

434 Trajectories were computed with a Runge-Kutta scheme of the 4th order with an  
435 integration time of 3 hours. Finite-size Lyapunov Exponents (FSLE) were com-  
436 puted following the methods in d'Ovidio et al. (2004), with initial and final sep-  
437 aration of  $0.04^\circ$  and  $0.4^\circ$  respectively. This Lagrangian diagnostic is commonly  
438 used to identify Lagrangian Coherent Structures. This method determines the  
439 location of barriers to transport, and it is usually associated with oceanic fronts  
440 Haller (2015).

441 *Temperature field.* The Sea Surface Temperature (SST) field was downloaded  
442 from the OSTIA global foundation Sea Surface Temperature product (SST\_GLO\_SST\_L4\_NRT\_OBSERVAT  
443 The data are represented over a regular grid with spatial resolution of  $0.05 \times 0.05^\circ$   
444 and daily-mean maps.

445 *Satellite data extrapolation.* For each point of the boat trajectory, we considered  
446 as value of the diagnostic the average value over a disc of radius  $\sigma$ . Different  
447  $\sigma$  were tested, and the best results were obtained with the  $\sigma = 0.2^\circ$ , reference  
448 value reported in the present work. This value is consistent with the uncertainty  
449 of the satellite velocity field.

## 450 Statistical processing

451 *Bootstrap method.* In this section, we describe the analysis necessary for the  
452 bootstrap test. To identify the frontal features, the following diagnostic values  
453 were chosen as thresholds for representing the front: for the FSLEs, we used  $0.08$   
454  $\text{days}^{-1}$ , a threshold value consistent with those chosen in De Monte et al. (2012)  
455 and obtained from Kai et al. (2009). For the SST gradient, we considered repre-  
456 sentative of thermal front values greater than  $0.9^\circ\text{C}/100$  km, which is about the  
457 half of the value chosen in De Monte et al. (2012). However, in that work, the

458 SST gradient was obtained from the advection of the SST field with satellite-  
459 derived currents for the previous 3 days, which structures it in high resolution  
460 features that therefore present higher gradient values.  
461 The threshold value splits the AFC into two groups: over and under the thresh-  
462 old. Their independency was tested using a Mann-Whitney or U test. Finally,  
463 bootstrap analysis is applied following the methodologies used in De Monte et al.  
464 (2012).  
465 *Linear quantile regression.* Linear quantile regression method Koenker (2005)  
466 is employed to estimate the effect of FSLE and SST gradient on the upper  
467 limit of the AFC, as in Sankaran et al. (2005). The percentiles values used are  
468 75th, 90th, 95th, and 99th. The analysis is performed using the statistical pack-  
469 age QUANTREG in R (<https://CRAN.R-project.org/package=quantreg>, v.5.38,  
470 Koenker (2005)), using the default settings.

## 471 Gradient climbing model

472 The fish searching dynamic is considered a one dimensional, individual-based,  
473 Markovian process. Time is discretized in timesteps of length  $\Delta\tau$ . We presuppose  
474 that, at each timestep, the fish chooses between swimming in one of the two  
475 directions. This decision depends on the comparison between the quantity of  
476 tracer at its actual position and the one perceived at a distance  $f_W$  from it,  
477 where  $f_W$  is the field view of the fish. We consider the fish immersed in a tracer  
478 whose concentration is described by the function  $T(x)$ .  
479 An expression for the average velocity of the fish,  $U_F(x)$ , can now be derived.  
480 We assume that the fish is able to observe simultaneously the tracer to its right  
481 and its left. Fish sensorial capacities are discussed in SI.2. The tracer observed  
482 is affected by a noise. Noise distribution is considered uniform, with  $-\xi_{MAX} <$   
483  $\xi < \xi_{MAX}$ ,  $\xi_{MAX} > 0$ . The effective values perceived by the fish, at its left and  
484 its right, will be, respectively:

$$\begin{aligned}\tilde{T}(x_0 - \Delta x) &= T(x_0 - \Delta x) + \xi_1 \\ \tilde{T}(x_0 + \Delta x) &= T(x_0 + \Delta x) + \xi_2 .\end{aligned}$$

485 We assume that, if  $\tilde{T}(x_0 + \Delta x) > \tilde{T}(x_0 - \Delta x)$ , the fish will move to the right,  
486 and, vice versa, to the left. We hypothesize that the observational range is small  
487 enough to consider the tracer variation as linear, as illustrated in Fig. S.6 (SI.3).  
488 In this way:

$$\begin{aligned}\tilde{T}(x_0 + \Delta x) &= T(x_0) + f_W \frac{\partial T}{\partial x} + \xi_1 \\ \tilde{T}(x_0 - \Delta x) &= T(x_0) - f_W \frac{\partial T}{\partial x} + \xi_2 .\end{aligned}$$

489 In case of absence of noise, or with  $\xi_{MAX} < f_W \frac{\partial T}{\partial x}$ , the fish will always move  
490 in the correct direction, in that it will climb the gradient. Assuming  $V$  as the

14 Fine-scale fronts as hotspots of fish aggregation in the open ocean.

491 cruising swimming velocity of the fish, this means  $U_F(x) = V$ .  
 492 Let's now assume  $\xi_{MAX} > f_W \frac{\partial T}{\partial x}$ . If  $T(x_0 + \Delta x) > T(x_0 - \Delta x)$  (as in Fig. S.6),  
 493 and the fish will swim leftward if

$$\xi_1 - \xi_2 > 2f_W \frac{\partial T}{\partial x}.$$

494 Since  $\xi_1$  and  $\xi_2$  range both between  $-\xi_{MAX}$  and  $\xi_{MAX}$ , we can obtain the prob-  
 495 ability of leftward moving  $P(L)$ . This will be the probability that the difference  
 496 between  $\xi_1$  and  $\xi_2$  is greater than  $2f_W \frac{\partial T}{\partial x}$

$$\begin{aligned} P(L) &= \frac{1}{8\xi_{MAX}^2} \left( 2\xi_{MAX} - 2f_W \frac{\partial T}{\partial x} \right)^2 \\ &= \frac{1}{2} \left( 1 - \frac{f_W}{\xi_{MAX}} \frac{\partial T}{\partial x} \right)^2 \end{aligned}$$

497 The probability of moving right will be

$$P(R) = 1 - P(L)$$

498 and their difference gives the frequency of rightward moving

$$\begin{aligned} P(R) - P(L) &= 1 - 2P(L) = 1 - \left( 1 - \frac{f_W}{\xi_{MAX}} \frac{\partial T}{\partial x} \right)^2 \\ &= \frac{f_W}{\xi_{MAX}} \frac{\partial T}{\partial x} \left( 2 - \frac{f_W}{\xi_{MAX}} \left| \frac{\partial T}{\partial x} \right| \right), \end{aligned}$$

499 where the absolute value of  $\frac{\partial T}{\partial x}$  has been added to preserve the correct climbing  
 500 direction in case of negative gradient. The above expression leads to:

$$U_F(x) = \frac{V f_W}{\xi_{MAX}} \frac{\partial T}{\partial x} \left( 2 - \frac{f_W}{\xi_{MAX}} \left| \frac{\partial T}{\partial x} \right| \right). \quad (2)$$

501 We then assume that, over a certain value of tracer gradient  $\frac{\partial T}{\partial x} \xi_{MAX}$ , the fish are  
 502 able to climb the gradient without being affected by the noise. This assumption,  
 503 from a biological perspective, means that the fish does not live in a completely  
 504 noisy environment, but that under favorable circumstances it is able to correctly  
 505 identify the swimming direction. This means that

$$f_W * \frac{\partial T}{\partial x} \xi_{MAX} = \xi_{MAX}. \quad (3)$$

506 Substituting then (3) into (2) gives:

$$U_F(x) = V \frac{\frac{\partial T}{\partial x}}{\frac{\partial T}{\partial x} \xi_{MAX}} \left( 2 - \frac{\left| \frac{\partial T}{\partial x} \right|}{\frac{\partial T}{\partial x} \xi_{MAX}} \right). \quad (4)$$

507 Finally, we can include an eventual effect of currents speed, considering that  
508 the tracer is transported passively by them, simply adding the current speed  $U_C$   
509 to Expr. (4).

510 The representations provided are individual based, with each individual repre-  
511 senting a single fish. However, we note that all the considerations done are also  
512 valid if we consider an individual representing a fish school.  $U_F$  will then simply  
513 represent the average velocity of the fish schools. This aspect should be stressed  
514 since many fish species live and feed in groups (see SI.2 for further details).

515 **Continuity equation in one dimension.** The solution of this model will now  
516 be discussed. The continuity equation is first considered in one dimension. The  
517 starting scenario is simply an initially homogeneous distribution of fish, that are  
518 moving in a one dimensional space with a velocity given by  $U_F(x)$ .  
519 We assume that in the time scales considered (few days to some weeks), the  
520 fish biomass is conserved, so for instance fishing mortality or growing rates are  
521 neglected. In that case, we can express the evolution of the concentration of the  
522 fish  $\rho$  by the continuity equation

$$\frac{\partial \rho}{\partial t} + \nabla \cdot \mathbf{j} = 0 \quad (5)$$

523 in which  $\mathbf{j} = \rho U_F(x)$ , so that Eq. (5) becomes

$$\frac{\partial \rho}{\partial t} + \nabla \cdot (\rho U_F(x)) = 0. \quad (6)$$

524 In one dimension, the divergence is simply the partial derivate along the  $x$ -axis.  
525 Eq. (6) becomes

$$\frac{\partial \rho}{\partial t} = -\frac{\partial}{\partial x} (\rho U_F) \quad (7)$$

526 Now, we decompose the fish concentration  $\rho$  in two parts, a constant one and a  
527 variable one  $\rho = \rho_0 + \tilde{\rho}$ . Eq. (7) will then become

$$\frac{\partial \rho}{\partial t} = -U_F \frac{\partial \tilde{\rho}}{\partial x} - \rho \frac{\partial U_F}{\partial x}. \quad (8)$$

528 Using Expr. (4), Eq. (8) is numerically simulated with the Lax method. In  
529 Expr. (4) we impose that  $U_F(x) = V$  when  $U_F(x) > V$ . This biological assump-  
530 tion means that fish maximal velocity is limited by a physiological constraint  
531 rather than by gradient steepness. Details of the physical and biological param-  
532 eters are provided in SI.5.

## 533 Acknowledgements

534 This work is a contribution to the CNES/TOSCA project LAECOS and BIOS-  
535 WOT, and was partly funded by the Copernicus Marine Environment Moni-  
536 toring Service (CMEMS) Sea Level Thematic Assembly Centre (SL-TAC). This  
537 work was supported financially and logistically by the Agence Nationale de la



16 Fine-scale fronts as hotspots of fish aggregation in the open ocean.

538 Recherche (ANR MyctO-3D-MAP, Programme Blanc SVSE 7 2011, Y. Cherel),  
539 the Institut Polaire Français Paul Emile Victor, and the Terres Australes et  
540 Antarctiques Françaises. The authors would also like to thank Mara Baudena,  
541 Bettina Fach, Philippe Koubbi, Mark Ohman, Sara Sergi, Lars Stemmann and  
542 Jost von Hardenberg for their helpful advice.

### 543 **Authors contribution**

544 A.B., E.S.G. and F.d.O designed the research with assistance from X.C. A.B.  
545 performed the research. A.B. and D.d.O. analyzed the data. C.C. and Y.C.  
546 provided the data. A.B. wrote the paper, with assistance from F.d.O., E.S.G.,  
547 D.d.O, X.C., and C.C.

## Bibliography

- Abrahms, B., Scales, K.L., Hazen, E.L., Bograd, S.J., Schick, R.S., Robinson, P.W., Costa, D.P., 2018. Mesoscale activity facilitates energy gain in a top predator. *Proc. R. Soc. B*, 285:20181101. doi:10.1098/rspb.2018.1101.
- Adler, J., 1975. Chemotaxis in bacteria. *Annual review of biochemistry*, 44:341–356.
- Alonzo, F., Mayzaud, P., Razouls, S., Bocher, P., Cherel, Y., 2003. Seasonal changes in biomass, growth rates and production of subantarctic calanoid copepods in the Bay of Morbihan, Kerguelen Islands. *Marine Biology*, 142:525–536. doi:10.1007/s00227-002-0976-5.
- Béhagle, N., Cotté, C., Lebourges-Dhaussy, A., Roudaut, G., Duhamel, G., Brehmer, P., Josse, E., Cherel, Y., 2017. Acoustic distribution of discriminated micronektonic organisms from a bi-frequency processing: The case study of eastern Kerguelen oceanic waters. *Progress in Oceanography*, 156:276 – 289. doi:https://doi.org/10.1016/j.pocean.2017.06.004.
- Bertrand, A., Grados, D., Colas, F., Bertrand, S., Capet, X., Chaigneau, A., Vargas, G., Mousseigne, A., Fablet, R., 2014. Broad impacts of fine-scale dynamics on seascape structure from zooplankton to seabirds. *Nature Communications*, 5:5239. doi:10.1038/ncomms6239.
- Boffetta, G., Lacorata, G., Redaelli, G., Vulpiani, A., 2001. Detecting barriers to transport: a review of different techniques. *Physica D: Nonlinear Phenomena*, 159:58–70. doi:10.1016/S0167-2789(01)00330-X.
- Cherel, Y., Fontaine, C., Richard, P., Labatc, J.P., 2010. Isotopic niches and trophic levels of myctophid fishes and their predators in the southern ocean. *Limnology and oceanography*, 55:324–332.
- De Monte, S., Cotté, C., d'Ovidio, F., Lévy, M., Le Corre, M., Weimerskirch, H., 2012. Frigatebird behaviour at the ocean–atmosphere interface: integrating animal behaviour with multi-satellite data. *Journal of The Royal Society Interface*, 9:3351–3358. doi:10.1098/rsif.2012.0509.
- De Monte, S., Soccodato, A., Alvain, S., d'Ovidio, F., 2013. Can we detect oceanic biodiversity hotspots from space? *The ISME journal*, 7:2054. doi:10.1038/ismej.2013.72.
- Della Penna, A., De Monte, S., Kestenare, E., Guinet, C., d'Ovidio, F., 2015. Quasi-planktonic behavior of foraging top marine predators. *Scientific reports*, 5. doi:10.1038/srep18063.
- d'Ovidio, F., De Monte, S., Della Penna, A., Cotté, C., Guinet, C., 2013. Ecological implications of eddy retention in the open ocean: a Lagrangian approach. *Journal of Physics A: Mathematical and Theoretical*, 46:254023. doi:10.1088/1751-8113/46/25/254023.
- d'Ovidio, F., Fernández, V., Hernández-García, E., López, C., 2004. Mixing structures in the Mediterranean Sea from finite-size Lyapunov exponents. *Geophysical Research Letters*, 31. doi:10.1029/2004GL020328.

- 590 d'Ovidio, F., Monte, S.D., Alvain, S., Dandonneau, Y., Lévy, M., 2010. Fluid dy-  
591 namical niches of phytoplankton types. *Proceedings of the National Academy*  
592 *of Sciences*, 107:18366–18370. doi:10.1073/pnas.1004620107.
- 593 Duhamel, G., Hulley, P.A., Causse, R., Koubbi, P., Vacchi, M., Pru-  
594 vost, P., Vigetta, S., Irisson, J.O., Mormède, S.A.B.M., Dettai,  
595 A.A.D.H.W.A.G.J.A.J.C.D., Kock, K.H., Lopez Abellan, L.J., Van de  
596 Putte, A.P., 2014. *Biogeographic Patterns Of Fish (Biogeographic Atlas of*  
597 *the Southern Ocean)*, chapter *Biogeographic Patterns Of Fish*, pages 328–362.  
598 Scientific Committee on Antarctic Research, Cambridge UK.
- 599 Gaines, S.D., White, C., Carr, M.H., Palumbi, S.R., 2010. Designing marine  
600 reserve networks for both conservation and fisheries management. *Proceedings*  
601 *of the National Academy of Sciences*. doi:10.1073/pnas.0906473107.
- 602 Genin, A., Jaffe, J.S., Reef, R., Richter, C., Franks, P.J.S., 2005. Swim-  
603 ming Against the Flow: A Mechanism of Zooplankton Aggregation. *Science*,  
604 308:860–862. doi:10.1126/science.1107834.
- 605 Greely, T.M., Gartner Jr, J.V., Torres, J.J., 1999. Age and growth of Elec-  
606 trona antarctica (Pisces: Myctophidae), the dominant mesopelagic fish of the  
607 Southern Ocean. *Marine Biology*, 133:145–158. doi:10.1007/s002270050453.
- 608 Haller, G., 2015. Lagrangian coherent structures. *Annual Review of Fluid Me-*  
609 *chanics*, 47:137–162. doi:10.1146/annurev-fluid-010313-141322.
- 610 Hoegh-Guldberg, O., Bruno, J.F., 2010. The Impact of Climate Change on  
611 the World's Marine Ecosystems. *Science*, 328:1523–1528. doi:10.1126/science.  
612 1189930.
- 613 Irigoien, X., Klevjer, T.A., Røstad, A., Martinez, U., Boyra, G., Acuña, J., Bode,  
614 A., Echevarria, F., Gonzalez-Gordillo, J., Hernandez-Leon, S., et al., 2014.  
615 Large mesopelagic fishes biomass and trophic efficiency in the open ocean.  
616 *Nature communications*, 5. doi:dx.doi.org/10.1038/ncomms4271.
- 617 Kai, E.T., Rossi, V., Sudre, J., Weimerskirch, H., Lopez, C., Hernandez-Garcia,  
618 E., Marsac, F., Garcon, V., 2009. Top marine predators track lagrangian  
619 coherent structures. *Proceedings of the National Academy of Sciences of the*  
620 *United States of America*, 106:8245–8250. doi:10.1073/pnas.0811034106.
- 621 Kasumyan, A., 2004. The olfactory system in fish: structure, function, and role  
622 in behavior. *Journal of Ichthyology*, 44:S180.
- 623 Kloser, R.J., Ryan, T.E., Young, J.W., Lewis, M.E., 2009. Acoustic observations  
624 of micronekton fish on the scale of an ocean basin: potential and challenges.  
625 *ICES Journal of Marine Science*, 66:998–1006. doi:10.1093/icesjms/fsp077.
- 626 Koenker, R., 2005. *Quantile Regression*. *Econometric Society Monographs*.  
627 Cambridge University Press. doi:10.1017/CBO9780511754098.
- 628 Koubbi, P., Moteki, M., Duhamel, G., Goarant, A., Hulley, P.A., ODriscoll, R.,  
629 Ishimaru, T., Pruvost, P., Tavernier, E., Hosie, G., 2011. Ecoregionalization  
630 of myctophid fish in the Indian sector of the Southern Ocean: Results from  
631 generalized dissimilarity models. *Deep Sea Research Part II: Topical Studies in*  
632 *Oceanography*, 58:170 – 180. doi:https://doi.org/10.1016/j.dsr2.2010.09.007.
- 633 Census of Antarctic Marine Life: Diversity and Change in the Southern Ocean  
634 Ecosystems.

- 635 Kwon, E.Y., Primeau, F., Sarmiento, J.L., 2009. The impact of remineralization  
636 depth on the air–sea carbon balance. *Nature Geoscience*, 2:630.
- 637 Labat, J.P., Mayzaud, P., Sabini, S., 2005. Population dynamics of *Themisto*  
638 *gaudichaudii* in Kerguelen Islands waters, Southern Indian Ocean. *Polar Bi-*  
639 *ology*, 28:776–783. doi:10.1007/s00300-005-0003-7.
- 640 Lara-Lopez, A.L., Davison, P., Koslow, J.A., 2012. Abundance and community  
641 composition of micronekton across a front off Southern California. *Journal of*  
642 *Plankton Research*, 34:828–848. doi:10.1093/plankt/fbs016.
- 643 Lehahn, Y., d’Ovidio, F., Koren, I., 2018. A satellite-based lagrangian view  
644 on phytoplankton dynamics. *Annual Review of Marine Science*, 10:99–119.  
645 doi:10.1146/annurev-marine-121916-063204. PMID: 28961072.
- 646 Lévy, M., Franks, P.J.S., Smith, K.S., 2018. The role of submesoscale currents  
647 in structuring marine ecosystems. *Nature Communications*, 9. doi:10.1038/  
648 s41467-018-07059-3.
- 649 Lévy, M., Martin, A.P., 2013. The influence of mesoscale and submesoscale het-  
650 erogeneity on ocean biogeochemical reactions. *Global Biogeochemical Cycles*,  
651 27:1139–1150. doi:10.1002/2012GB004518.
- 652 Martin, A., 2003. Phytoplankton patchiness: the role of lateral stirring and  
653 mixing. *Progress in Oceanography*, 57:125 – 174. doi:https://doi.org/10.1016/  
654 S0079-6611(03)00085-5.
- 655 McGillicuddy, D.J., 2016. Mechanisms of Physical-Biological-Biogeochemical In-  
656 teraction at the Oceanic Mesoscale. *Annual Review of Marine Science*, 8:125–  
657 159. doi:10.1146/annurev-marine-010814-015606. PMID: 26359818.
- 658 McManus, M.A., Woodson, C.B., 2012. Plankton distribution and ocean disper-  
659 sal. *Journal of Experimental Biology*, 215:1008–1016. doi:10.1242/jeb.059014.
- 660 Morrow, R., Fu, L.L., Ardhuin, F., Benkiran, M., Chapron, B., Cosme, E.,  
661 D’Ovidio, F., Farrar, J.T., Gille, S.T., Lapeyre, G., et al., 2019. Global ob-  
662 servations of fine-scale ocean surface topography with the surface water and  
663 ocean topography (swot) mission. *Frontiers in Marine Science*, 6:232.
- 664 Netburn, A.N., Koslow, J.A., 2018. Mesopelagic fish assemblages across oceanic  
665 fronts: A comparison of three frontal systems in the southern California Cur-  
666 rent Ecosystem. *Deep Sea Research Part I: Oceanographic Research Papers*,  
667 134:80 – 91. doi:https://doi.org/10.1016/j.dsr.2018.03.005.
- 668 Ohman, M.D., 1988. Sources of variability in measurements of copepod lipids  
669 and gut fluorescence in the california current coastal zone. *Marine Ecology*  
670 *Progress Series*, 42:143–153.
- 671 Pakhomov, E., Perissinotto, R., McQuaid, C., 1996. Prey composition and daily  
672 rations of myctophid fishes in the southern ocean. *Marine Ecology Progress*  
673 *Series*, pages 1–14.
- 674 Pakhomov, E.A., Froneman, P.W., 2000. Composition and spatial variability  
675 of macroplankton and micronekton within the Antarctic Polar Frontal Zone  
676 of the Indian Ocean during austral autumn 1997. *Polar Biology*, 23:410–419.  
677 doi:10.1007/s0030000050462.
- 678 PC, E.F., RL, O., JC, M., 2018. Predicting distribution and relative abun-  
679 dence of mid-trophic level organisms using oceanographic parameters and

- acoustic backscatter. *Marine Ecology Progress Series*, 592:37–56. doi:  
10.3354/meps12519.
- Penna, A.D., Koubbi, P., Cott, C., Bon, C., Bost, C.A., d'Ovidio, F., 2017.  
Lagrangian analysis of multi-satellite data in support of open ocean Marine  
Protected Area design. *Deep Sea Research Part II: Topical Studies in Oceanog-*  
*raphy*, 140:212 – 221. doi:<https://doi.org/10.1016/j.dsr2.2016.12.014>. Future  
of oceanic animals in a changing ocean.
- Prants, S., Budyansky, M., Uleysky, M., 2014. Identifying Lagrangian fronts  
with favourable fishery conditions. *Deep Sea Research Part I: Oceanographic*  
*Research Papers*, 90:27 – 35. doi:<https://doi.org/10.1016/j.dsr.2014.04.012>.
- Robinson, L.M., Elith, J., Hobday, A.J., Pearson, R.G., Kendall, B.E., Possing-  
ham, H.P., Richardson, A.J., 2011. Pushing the limits in marine species distri-  
bution modelling: lessons from the land present challenges and opportunities.  
*Global Ecology and Biogeography*, 20:789–802. doi:10.1111/j.1466-8238.2010.  
00636.x.
- Sankaran, M., Hanan, N.P., Scholes, R.J., Ratnam, J., Augustine, D.J., Cade,  
B.S., Gignoux, J., Higgins, S.I., Le Roux, X., Ludwig, F., et al., 2005. De-  
terminants of woody cover in African savannas. *Nature*, 438:846. doi:  
10.1038/nature04070.
- Sato, M., Barth, J.A., Benoit-Bird, K.J., Pierce, S.D., Cowles, T.J., Brodeur,  
R.D., Peterson, W.T., 2018. Coastal upwelling fronts as a boundary for plank-  
tivorous fish distributions. *Marine Ecology Progress Series*, 595:171–186. doi:  
10.3354/meps12553.
- Saunders, R.A., Fielding, S., Thorpe, S.E., Tarling, G.A., 2013. School char-  
acteristics of mesopelagic fish at South Georgia. *Deep Sea Research Part I:*  
*Oceanographic Research Papers*, 81:62 – 77. doi:<https://doi.org/10.1016/j.dsr.2013.07.007>.
- Scales, K.L., Hazen, E.L., Jacox, M.G., Castruccio, F., Maxwell, S.M., Lewison,  
R.L., Bograd, S.J., 2018. Fisheries bycatch risk to marine megafauna is inten-  
sified in Lagrangian coherent structures. *Proceedings of the National Academy*  
*of Sciences of the United States of America*. doi:10.1073/pnas.1801270115.
- Snyder, S., Franks, P.J.S., Talley, L.D., Xu, Y., Kohin, S., 2017. Crossing the  
line: Tunas actively exploit submesoscale fronts to enhance foraging success.  
*Limnology and Oceanography Letters*, 2:187–194. doi:10.1002/lol2.10049.
- St. John, M.A., Borja, A., Chust, G., Heath, M., Grigorov, I., Mariani, P., Mar-  
tin, A.P., Santos, R.S., 2016. A Dark Hole in Our Understanding of Marine  
Ecosystems and Their Services: Perspectives from the Mesopelagic Commu-  
nity. *Frontiers in Marine Science*, 3:31. doi:10.3389/fmars.2016.00031.
- Sulman, M.H., Huntley, H.S., Lipphardt, B., Kirwan, A., 2013. Leaving flatland:  
Diagnostics for Lagrangian coherent structures in three-dimensional flows.  
*Physica D: Nonlinear Phenomena*, 258:77 – 92. doi:<https://doi.org/10.1016/j.physd.2013.05.005>.
- Sutton, T.T., Clark, M.R., Dunn, D.C., Halpin, P.N., Rogers, A.D., Guinotte,  
J., Bograd, S.J., Angel, M.V., Perez, J.A.A., Wishner, K., Haedrich, R.L.,  
Lindsay, D.J., Drazen, J.C., Vereshchaka, A., Piatkowski, U., Morato, T.,  
Bachowiak-Samoyk, K., Robison, B.H., Gjerde, K.M., Pierrot-Bults, A.,

- 726 Bernal, P., Reygondeau, G., Heino, M., 2017. A global biogeographic clas-  
727 sification of the mesopelagic zone. *Deep Sea Research Part I: Oceanographic*  
728 *Research Papers*, 126:85 – 102. doi:<https://doi.org/10.1016/j.dsr.2017.05.006>.  
729 Vidal, J., 1980. Physioecology of zooplankton. I. Effects of phytoplankton con-  
730 centration, temperature, and body size on the growth rate of *Calanus pacificus*  
731 and *Pseudocalanus* sp. *Marine Biology*, 56:111–134. doi:10.1007/BF00397129.  
732 Watson, J.R., Fuller, E.C., Castruccio, F.S., Samhuri, J.F., 2018. Fishermen  
733 Follow Fine-Scale Physical Ocean Features for Finance. *Frontiers in Marine*  
734 *Science*, 5. doi:10.3389/fmars.2018.00046.  
735 Woodson, C.B., Litvin, S.Y., 2015. Ocean fronts drive marine fishery production  
736 and biogeochemical cycling. *Proceedings of the National Academy of Sciences*,  
737 112:1710–1715. doi:10.1073/pnas.1417143112.  
738 Yoder, J.A., Ackleson, S.G., Barber, R.T., Flament, P., Balch, W.M., 1994. A  
739 line in the sea. *Nature*, 371:689. doi:10.1038/371689a0.
